# Supplementary material for: IL-6, IL-12, and IL-23 STAT-Pathway Genetic Risk and Responsiveness of Lymphocytes in Patients with Multiple Sclerosis
Source: PubMed Central journal article supplement (PMC6468786; doi:10.3390/cells8030285), 2019-03-26
Supplement: cells-08-00285-s001.pdf [file cells-08-00285-s001.pdf]

## Supplementary Table S1

| <b>Gene</b>    | <b>MS risk variant (SNP)</b> | <b>Odds ratio (OR)</b> | <b>Reference</b> |
|----------------|------------------------------|------------------------|------------------|
| <i>IL6ST</i>   | rs7731626                    | 1.094                  | [4]              |
| <i>IL12RB1</i> | rs740691                     | 1.120 <sup>1</sup>     | [4]              |
| <i>JAK1</i>    | rs72922276                   | 1.164                  | [4]              |
| <i>TYK2</i>    | rs34536443                   | 1.204                  | [4]              |
| <i>SOCS1</i>   | rs12596260                   | 1.091 <sup>2</sup>     | [4]              |
| <i>STAT3</i>   | rs1026916                    | 1.114                  | [4]              |
| <i>STAT4</i>   | rs6738544                    | 1.074                  | [4]              |

Gene name, MS-risk variant and odds ratio used to calculate the IL-6, IL-12, and IL-23 STAT-pathway weighted genetic risk score (wGRS) of the individual donors. <sup>1</sup>The reference OR is for the SNP rs4808760 which is in large linkage disequilibrium (LD) with rs740691. <sup>2</sup>The reference OR is for the SNP rs36090551 which is in large LD with rs12596260.
